# 1            **Revealing Spatiotemporal Circuit Information of Olfactory Bulb in Large-scale Neural Recordings**

2            Xin Hu<sup>1</sup>, Shahrukh Khanzada<sup>1</sup>, Diana Klütsch<sup>1</sup>, Federico Calegari<sup>2</sup>, Hayder Amin<sup>1\*</sup>

3            <sup>1</sup>Biohybrid neuroelectronics laboratory, German Center for Neurodegenerative Diseases (DZNE), Dresden,  
4            Germany

5  
6            <sup>2</sup>Proliferation and differentiation of neural stem cells laboratory, Center for Regenerative Therapies TU Dresden  
7            (CRTD), Dresden, Germany

8  
9            \*Correspondence should be addressed to Hayder Amin ([hayder.amin@dzne.de](mailto:hayder.amin@dzne.de))  
10

## 11            **ABSTRACT**

12            Large-scale multi-site biosensors are essential to probe the olfactory bulb (OB) circuitry for understanding  
13            the spatiotemporal dynamics of simultaneous discharge patterns. Current ex-vivo electrophysiological  
14            techniques are limited to recording a small set of neurons and cannot provide an inadequate resolution,  
15            which hinders revealing the fast dynamic underlying the information coding mechanisms in the OB circuit.  
16            Here, we demonstrate a novel biohybrid OB-CMOS platform to decipher the cross-scale dynamics of OB  
17            electrogenesis and quantify the distinct neuronal coding properties. The approach with 4096-  
18            microelectrodes offers a non-invasive, label-free, bioelectrical imaging to decode simultaneous firing  
19            patterns from thousands of connected neuronal ensembles in acute OB slices. The platform can measure  
20            spontaneous and drug-induced extracellular field potential activity. We employ our OB-CMOS recordings  
21            to perform multidimensional analysis to instantiate specific neurophysiological metrics underlying the  
22            olfactory spatiotemporal coding that emerged from the OB interconnected layers. Our results delineate  
23            the computational implications of large-scale activity patterns in functional olfactory processing. The high-  
24            content characterization of the olfactory circuit could benefit better functional interrogations of the  
25            olfactory spatiotemporal coding, connectivity mapping, and, further, the designing of reliable and  
26            advanced olfactory cell-based biosensors for diagnostic biomarkers and drug discovery.  
27

## 28            **KEYWORDS**

29            Olfactory bulb, electrogenesis, CMOS-MEAs, neuronal circuits, olfactory spatiotemporal coding,  
30            regeneration

## 31            **INTRODUCTION**

32            The olfactory bulb (OB) is a vital chemosensory structure of the information coding mechanisms<sup>1</sup>. It allows  
33            vertebrates to process and discriminate vast complex odorants and distinguish them with high selectivity  
34            and sensitivity<sup>2,3</sup>. The OB's neuronal processes are distributed intricately, composed of an abundance of  
35            dendrodendritic interactions and a stratified structure in five connected layers<sup>4,5</sup>. The OB also renders a  
36            distinctive form of morpho-functional neuronal plasticity conferred by a constant supply of new neurons  
37            (i.e., adult neurogenesis), allowing profound remodeling of the bulbar circuit in response to experience  
38            and challenges<sup>6</sup>.

39            This organization represents a high degree of plasticity and is the first relay station of olfactory perception  
40            with downstream information processing from the primary sensory epithelium to high-order neurons in  
41            subcortical and cortical areas for odor identification and interpretation<sup>7-9</sup>.

42            This high dimensionality of olfactory processing and odor coding properties inspired the development of  
43            biomimetic olfactory sensors, i.e., electronic noses<sup>10-12</sup>. They promise potential advances in medical

44 diagnosis, food quality, environmental, and military applications<sup>13</sup>. However, a fundamental inherent  
45 shortfall in these electronic nose systems is the lack of realistic dynamics at the physiological cellular and  
46 network levels, thus hindering this technology's exploitation for further challenging applications<sup>14</sup>. Hence,  
47 considerable achievements in genetic, biotechnology, and bioengineering have been put forth to enable  
48 the implementation of olfactory cell-based biosensors (i.e., bioelectronic noses)<sup>14,15</sup> to circumvent the  
49 limitations of conventional electronic noses and to promote specific measurement of target odorants<sup>16</sup>.  
50 In this context, many studies have been reported to employ a range of different olfactory cell-based  
51 biosensors<sup>16-18</sup>. Notably, a roadmap for advancing this technology has focused on deciphering the  
52 inherent plasticity mechanisms of olfactory information encoded in the orchestrated spatiotemporal  
53 activity patterns to refine and stabilize the OB sensory information<sup>9</sup>. These patterns are rhythmic neuronal  
54 synchronizations that encompass time-varying spatial distributions of discrete spike trains superimposed  
55 and complemented with a slow oscillation  $< \sim 300$  Hz of the local field potentials (LFPs) that reflect  
56 subthreshold integrative processes<sup>19-21</sup>.

57 On the other hand, the mammalian olfactory system generates rhythmic oscillations of LFPs that exhibit  
58 a functional role in local odor processing and odor discrimination (i.e., gamma frequency band; 40-100  
59 Hz)<sup>22</sup>, odor learning and experience (i.e., beta band; 15-30 Hz)<sup>23</sup>, and respiratory oscillations overlapping  
60 with the (theta band; 2-12 Hz)<sup>24</sup>. Thus, investigating the electrophysiological properties is crucial to further  
61 understand the local OB functional circuit connections and behavior and how they shape sensory  
62 processing. In view of these demands, many previous studies have used cell or slice-based biosensors to  
63 report experimental paradigms and classical recording techniques for different olfactory signal biosensing  
64 such as microelectrode arrays (MEAs)<sup>25-27</sup>, semiconductor field-effect transistors<sup>28,29</sup>, patch-clamp  
65 recordings<sup>30</sup>, light addressable potentiometric sensors<sup>31</sup>, quartz crystal microbalance<sup>32</sup>, electrochemical  
66 impedance spectroscopy<sup>33</sup>, and surface Plasmon resonance<sup>34</sup>.

67 Also, these efforts are aided by insights from computational models<sup>35</sup> and neuromorphic computing<sup>36</sup>.  
68 Despite MEAs shortcomings (i.e., low spatial resolution due to low numbers of recording electrodes), this  
69 method enables non-invasive, multi-site, long-term, and label-free probing of neuronal firing activity  
70 without disruption of cellular integrity. Recently, the manufacturing of low-cost semiconductor  
71 techniques based on complementary metal-oxide-semiconductor (CMOS) technology has been  
72 introduced into the design of biosensors<sup>37</sup> and the implementation of a high-density active-pixel sensor  
73 (APS) MEAs<sup>38,39</sup>. Thereafter, APS CMOS-MEAs have been exploited in a wide range of neuroscience and  
74 bioengineering applications<sup>40-42</sup>. Their unique inherent features with on-chip addressing and multiplexing  
75 and high signal-to-noise ratio (SNR) allow the measurement of neural signals at high spatiotemporal  
76 resolution with simultaneous recordings from several thousands of electrodes both *in vitro*<sup>38,39</sup> and *in*  
77 *vivo*<sup>43</sup>. In turn, these features enabled large-scale recordings and network information analysis from the  
78 interaction of various neuronal components to facilitate understanding the mechanisms that give rise to  
79 behavior-dependent of cell assembly patterns<sup>44</sup>. However, spatiotemporal circuit interactions underlying  
80 OB coding mechanisms have remained mostly elusive, hindering the development of advanced olfactory-  
81 cell-based sensors. Although existing olfactory-MEA biosensors have endowed valuable results, a clear  
82 understanding of the interareal coordination of bulbar circuitry mechanisms has lagged behind.

83 In this study, we report a novel Biohybrid Olfactory Neural Circuit on a CMOS-chip (BIONICS) capable of  
84 recording massively simultaneous neuronal firing patterns in acute mouse OB slices. The platform  
85 integrates large and dense electrode arrays (i.e., 4096-microelectrodes) and on-chip signal processing  
86 implemented in a CMOS-chip. The combination of the OB circuit and the high-density electrode  
87 configuration allows the recording of real-time spontaneous and pharmacologically-evoked activation of

88 the OB neural circuit from thousands of connected neuronal ensembles within the interareal layers of the  
89 OB operated in ex vivo. We further exploit our OB-CMOS-chip recordings with fundamental basic and  
90 advance analyses to instantiate specific neurophysiological metrics underlying the olfactory  
91 spatiotemporal information that emerged from the OB interconnected layers. Therefore, we characterize  
92 the rhythmic oscillations of the LFPs, oscillatory frequency bands, and coherence magnitude for single  
93 electrode activity as well as between OB layers. We also identify the event initiation onsets and quantify  
94 the dynamic profiles of signal propagation patterns. The rich information ingrained in our unique datasets  
95 also allows us to compute the spatial neural sources that contribute to the LFPs by using the kernel current  
96 source density (kCSD) method, functional connectivity (FC) maps, and topological interaction of thousands  
97 of active OB neuronal ensembles that delineate the construction of functional OB circuitry. Finally, we  
98 validated our platform to unveil a large-scale functional remodeling in the OB circuitry due to ongoing  
99 neurogenesis using a well-established and reported mouse model of enhanced neural stem cell  
100 expansion<sup>45-47</sup>.

101 To our knowledge, this is the first report of a high-density CMOS-neurochip that allows revealing the  
102 spatiotemporal functional processing in the interconnected OB circuit. Deciphering the mechanism of  
103 large-scale OB electrogenesis will enhance our understanding of the neuronal ensembles' functional  
104 organization. It will also provide an effective tool to investigate information processing and  
105 spatiotemporal coding in the OB circuit. Together, our results offer vital evidence for the future  
106 development of biomimetic olfaction detection biosensors for various applications.

## 107 MATERIALS AND METHODS

108 **Animals and OB acute slices preparation.** All experiments were performed on 8 weeks C57BL/6j (Charles  
109 River Laboratories, Germany) and triple transgenic 4D- and 4D+ mice, previously described<sup>45</sup>. All work and  
110 animal procedures were performed in accordance with the applicable European and national regulations  
111 (Tierschutzgesetz) and were approved by the local authority (Landesdirektion Sachsen; 25-5131/476/14  
112 and DD24-9168.11-1/2011-11, TVV13/2016, and HD35-9185.81/G-61/15). Mice were anesthetized with  
113 isoflurane before decapitation. The brain and OB were carefully removed from the skull and placed in a  
114 chilled cutting sucrose solution before slicing. The Brain and OB were fixed on the cutting plate, and  
115 horizontal slices (300  $\mu\text{m}$  thick) were prepared using Leica Vibratome VT1200S (Leica Microsystems,  
116 Germany). Slices were cut at 0-2°C in aCSF solution saturated with 95% O<sub>2</sub> and 5% CO<sub>2</sub> (pH = 7.2-7.4) of a  
117 high sucrose solution containing in mM: 250 Sucrose, 10 Glucose, 1.25 NaH<sub>2</sub>PO<sub>4</sub>, 24 NaHCO<sub>3</sub>, 2.5 KCl, 0.5  
118 Ascorbic acid, 4 MgCl<sub>2</sub>, 1.2 MgSO<sub>4</sub>, 0.5 CaCl<sub>2</sub>. Next, OB slices were incubated for 45 min at 34°C and then  
119 allowed to recover for at least 1 hour at room temperature before used for recordings with CMOS-chips,  
120 in a recording aCSF solution containing in mM: 127 NaCl, 2.5 KCl, 1.25 NaH<sub>2</sub>PO<sub>4</sub>, 24 NaHCO<sub>3</sub>, 25 Glucose,  
121 1.2 MgSO<sub>4</sub>, 2.5 CaCl<sub>2</sub>, and the solution was aerated with 95% O<sub>2</sub> and 5% CO<sub>2</sub>.

122 **Biohybrid OB-CMOS biosensor recordings.** We performed all extracellular recordings using CMOS-  
123 biosensors and an acquisition system (3Brain AG, Switzerland) customized to our BIONICS setup. CMOS-  
124 chips integrate 4096 recording electrodes with 42  $\mu\text{m}$  pitch-size to compose an active sensing area of ~7  
125 mm<sup>2</sup>, ideal for recording from the entire ~4 mm<sup>2</sup> OB tissue. The on-chip amplification circuit allows for  
126 0.1-5kHz bandpass filtering conferred by a global gain of 60 dB sufficient to record slow and fast  
127 oscillations. Modular Stereo microscope Leica MZ10F (Leica Microsystems, Germany) was designed and  
128 incorporated into the setup to capture OB slices' light-imaging simultaneously with the whole-circuit firing  
129 pattern recordings. All CMOS-chips were coated with 0.1 mg/ml PDLO (Sigma-Aldrich, Germany) and

130 incubated for 30 min at 37°C before recordings. Then, slices were moved onto chips, and the coupling  
131 between OB slices and CMOS-electrodes was enhanced with a custom-made platinum harp placed above  
132 the tissue. Slices were perfused continuously with oxygenated recording solution at 4 ml/min. We  
133 collected 10 min of spontaneous and pharmacological-induced extracellular recordings at 14  
134 kHz/electrode sampling frequency and stored them for offline analysis. We used Brainwave software  
135 (3Brain AG, Switzerland) for data recording and employed a hard threshold algorithm to perform LFP  
136 detection with a 10 ms refractory period and a 500 ms maximum event duration.

137 **Drug treatment.** We prepared fresh solutions of all drugs for each experiment by dissolving the drug in  
138 the recording solution. The final working concentrations used for all experiments were 100 μM, 30 μM,  
139 and 10 μM of 4AP, BiC, and MK-801 (Sigma-Aldrich, Germany), respectively.

140 **Immunohistochemistry and fluorescence imaging.** Brains with OB were perfused and post-fixed  
141 overnight in 4% PFA at 4°C. Immunohistochemistry was performed as described<sup>45</sup>. The images were  
142 acquired with an automated Zeiss ApoTome confocal microscope (LSM 780, Carl Zeiss, Germany).

143 **Data Analysis.** All basic and advanced algorithms used in this study were developed as custom-written  
144 Python scripts.

145 **Mean activity basic analysis.** We selected four parameters to describe the mean activity features of large-  
146 scale spatiotemporal LFP oscillations, including amplitude, energy, frequency, and duration. The signal  
147 amplitude analysis was obtained by full-wave rectification and low-pass filtering (cutoff frequency 100  
148 Hz). The energy is defined as the area under the squared magnitude of the LFP rates for a specific time  
149 window.

150 **Lognormal distribution.** The LFP firing patterns of the OB neuronal ensembles show a wide degree of  
151 participation in the circuit activity and followed a skewed lognormal distribution. Thus, we computed the  
152 probability density function for the lognormal distribution:

153 
$$p(x) = \frac{1}{x\sigma\sqrt{2\pi}} e^{-(\ln x - \mu)^2 / 2\sigma^2}$$

154 Where  $\mu$  is the mean, and  $\sigma$  is the standard deviation.

155 **Gini coefficient and CV<sub>2</sub>.** To quantify the inequality of participation of individual neurons in the OB circuit,  
156 we employed the Gini index as a commonly used measure of inequality and sparsity<sup>48</sup> and computed as  
157 the ratio of the areas on the Lorenz curve diagram:

158 
$$Gini = \frac{A}{A + B}$$

159 Where  $A$  is the area above the Lorenz curve, and  $B$  is the area below for the cumulative LFP firing rates.

160 To assess the local-trial variability of the firing patterns, we used the coefficient of variation (CV<sub>2</sub>)<sup>49</sup>, which  
161 is defined as the function of pairs of adjacent inter-LFP-event intervals  $IEI_i$  and  $IEI_{i+1}$  divided by the  
162 average of the event intervals.

163 
$$CV_2(i) = \frac{2|IEI_i - IEI_{i+1}|}{IEI_i + IEI_{i+1}}$$

164 **Time-frequency and PSD analyses.** We first constructed the frequency-time dynamics in pseudo-color  
165 spectrograms for a selected 10 sec time window using a filtered LFPs (1-100 Hz). Next, we computed the  
166 Periodograms to identify dominant frequencies in the oscillatory activity in a given time-series. The  
167 spectra were calculated using Welch's method<sup>50</sup> by calculating the Fast Fourier Transform of the recorded  
168 LFPs to estimate the power spectral density (PSD).

169 **Waveform classification.** To characterize and allocate the nonsinusoidal shapes of the recorded LFP  
170 waveforms to their OB layers, we developed a procedure consisting of four steps. First, (waveform  
171 extraction) - we detected active firing electrodes clustered based on their structural relation to the OB  
172 layers. We extracted information from hundreds of waveform segments that occurred at least in three  
173 consecutive LFP events. Second, (Pre-processing) – all detected and extracted waveforms were denoised  
174 by hard threshold algorithm and filtered by Low pass filter (1-100 Hz). Third, (Parameter Identification) –  
175 we defined in our extracted waveforms four features, including amplitude (waveform height feature),  
176 period, rise-decay symmetry (slope features), and area (area feature). Fourth, (classification and  
177 clustering), we reduced the dimensionality of the computed waveform features using the Principal  
178 Component Analysis (PCA) and K-means clustering algorithms<sup>51</sup> to identify best-classified waveform  
179 shapes into five clusters associated with the GL, GCL, PL, ONL, and OCx layers.

180 **Spatial coherence.** To measure the predictable relationship between firing LFP rates at different spatial  
181 locations of the OB circuit, we calculated the 2D spatial coherence maps. We calculated the correlation  
182 between pairs of firing electrodes of the CMOS-chip (64 x 64 electrodes) arranged in rows (x) and columns  
183 (y). The function is a dimensionless quantity and ranges between (0,1) and defined as<sup>52</sup>:

$$184 \quad C_{xy}(f) = \frac{|P_{xy}(f)|^2}{P_{xx}(f)P_{yy}(f)}$$

185 Where  $P_{xx}(f)$  and  $P_{yy}(f)$  are the autospectral density of the firing x and y, respectively, and  $P_{xy}(f)$  is the  
186 cross-spectrum density of the firing x and y estimated using Welch's method. A Spatial coherence near  
187 one indicates that the active electrodes encode all information of the firing rate of that spectral frequency  
188 component. In contrast, a value close to zero indicates no information of the firing is present.

189 **LFP propagation dynamics.** To quantify the propagation magnitude of the spatiotemporal LFP Events in  
190 all interconnected OB layers, we employed the center-of-activity trajectories (CATs) analysis<sup>53,54</sup>. We used  
191 the voltage values embedded in the LFP frame activities within 5 ms moving time bins to collect the CAT  
192 magnitudes in each firing event. The value of the CA at time  $t$  is a two-dimensional vector defined as:

$$193 \quad \vec{CA}(t) = [CA_x, CA_y] = \frac{\sum_{E=1}^n V_{tm}(E) \cdot [Col(E) - R_{col}, Row(E) - R_{row}]}{\sum_{E=1}^n V_{tm}(E)}$$

194 Where  $V_{tm}(E)$  represents the LFP firing rate corresponding to the active electrodes  $E$  within a time  
195 window ( $tm$ ). Also,  $Col(E)$  and  $Row(E)$  are the column and row numbers of the associated  $E$ . Then,  $R_{col}$   
196 and  $R_{row}$  are the coordinates of the physical center of 64 x 64 electrodes.  $n$  is the total number of active  
197 electrodes. Then, the CA trajectory from  $t_0$  to  $t_1$  with a time step  $\Delta t$  is defined as:

198 
$$\overline{CA\vec{T}}(t_0, t_1) = \overline{CA}(t_0), \overline{CA}(t_0 + \Delta t), \overline{CA}(t_0 + 2\Delta t), \dots, \overline{CA}(t_1)$$

199 **Velocity of conduction.** To track the putative displacement of  $\overline{CA}$  of LFP events in the entire  
200 interconnected OB circuit, the velocity of conduction was calculated as the average of instantaneous  
201 vector quantity displacements calculated for the time of a propagating LFP event and expressed as:

202 
$$\overrightarrow{Velocity} = \frac{\overline{\Delta d}}{\Delta t}$$

203 Where  $\Delta d$  is the change in displacement and  $\Delta t$  is the change in time.

204 **Functional connectivity and causal links.** To infer the large-scale statistical dependent connectivity in a  
205 multilayered OB network, we first calculated the cross-covariance between pairs of active electrodes in  
206 the 64 x 64 array using the Pearson correlation coefficient (PCC)<sup>55</sup>. The correlation coefficient between  
207 electrodes was then sorted based on the OB layers and presented in a symmetric matrix. The PCC is  
208 defined as:

209 
$$PCC_{xy} = \frac{n \sum xy - \sum x \sum y}{\sqrt{n \sum x^2 - (\sum x)^2} \sqrt{n \sum y^2 - (\sum y)^2}}$$

210 Where  $x, y$  denoted the values of pair electrodes time series for  $n$  number of the active array.

211 Then, we performed the Multivariate Granger causality by fitting a vector autoregressive model to the  
212 time series to quantify the influence of one time series on another<sup>56</sup>. To measure the directional  
213 information flow within the correlated links in the network, we performed the Directed Transfer Function  
214 (DTF)<sup>57</sup>.

215 **Current source density.** To estimate the current sources generating the extracellular low-frequency  
216 potentials recorded in all OB layers, we used the Kernel Current Source Density (kCSD) Analysis<sup>58</sup>,  
217 described in the kCSD-python package and available on GitHub ([https://github.com/Neuroinflab/kCSD-  
218 python](https://github.com/Neuroinflab/kCSD-python)).

219 **Network efficiency and wiring cost.** To quantitatively measure a precise information flow and exchange  
220 of parallel integrated processing in the interconnected OB network, we used the measure of global, local  
221 efficiencies<sup>59</sup>, and connection cost. These are dimensionless measures ranging from 0 to 1. The global  
222 efficiency can be defined as the inverse of the average of shortest path lengths between all nodes in the  
223 network and calculated as:

224 
$$E_{global} = \frac{1}{N(N-1)} \sum_{i \neq j \in G} \frac{1}{L_{i,j}}$$

225 Where  $N$  is the number of all nodes in the network,  $L_{i,j}$  is the average path length between all nodes in  
226 the network.

227 Further, based on local clusters, the local efficiency is the average efficiency of clusters (subgraph) for a  
228 node with the neighbors, and calculated as:



229 
$$E_{local} = \frac{1}{N_{G_i}(N_{G_i} - 1)} \sum_{k \neq j \in G_i} \frac{1}{L_{k,j}}$$

230 Where  $N_{G_i}$  is the number of nodes in the local subgraphs (clusters)  $G_i$  of the network,  $L_{k,j}$  is the path  
231 length between pair nodes in the cluster.

232 **Wiring cost.** The network cost was estimated based on the minimum spanning tree (MST) method using  
233 the Kruskal algorithm. This approach is calculating the shortest path length connecting all network nodes  
234 at the cheapest cost.

235 **Statistical analysis.** All statistical analyses were performed with Originlab 2020. All data in this work were  
236 expressed as the mean  $\pm$  standard error of the mean (SEM). All box charts are determined by the 25<sup>th</sup>- 75<sup>th</sup>  
237 percentiles, and the whiskers by the 5<sup>th</sup>- 95<sup>th</sup> percentiles, and lengths within the Interquartile range (1.5  
238 IQR). Also, the lines depict the median and the squares for the mean values. Differences between groups  
239 were examined for statistical significance, where appropriate, using one-way analysis of variance (ANOVA)  
240 or two-way ANOVA followed by Tukey's posthoc testing.  $P < 0.05$  was considered significant.

## 241 RESULTS AND DISCUSSION

242 In what follows, we first developed and implemented a hybrid biosensor platform by integrating the OB  
243 circuit into a CMOS-MEA chip, which allowed us to record LFPs and spikes from the OB multilayers. Next,  
244 we exploited the multidimensional data focusing on the LFPs to infer and provide new insights about the  
245 subthreshold integrative processes in high spatiotemporal resolution expressed by extracting unique  
246 dynamic features of the oscillatory activity and functional mapping across the OB circuitry. (i.e., frequency  
247 spectrum, coherence, cross-correlation, causal connectivity, and assessing neurogenic remodeling effect).

### 248 Implementation of the large-scale BIONICS platform

249 To quantitatively probe the large-scale firing patterns and characterize the olfactory spatiotemporal  
250 coding of the whole-multilayered, we engineered a biohybrid OB-CMOS biosensor platform (BIONICS)  
251 (**Figure 1**). It combines isolated whole-OB acute slices and a CMOS-chip. The OB-CMOS-chip continuously  
252 perfused with an optimized aCSF to maintain high viability and stable, functional responses for several  
253 hours ( $n=24$  slices from 8 adult mice at 8 weeks old). Also, we employed optical imaging into the  
254 bioelectrical OB-CMOS-based setup allowing the light-imaging acquisition of OB slices concurrently with  
255 the whole-circuit firing pattern recordings (**Figure 1a**). The CMOS-chip integrates a 64 x 64  
256 microelectrodes pixel array to allow the simultaneous recordings of sub-millisecond extracellular firing  
257 information from the entire OB circuitry (**Figure 1b**). The active sensing area of the CMOS-chip is 2.69 x  
258 2.69 mm (i.e., 4096 microelectrodes with 42  $\mu$ m pitch)<sup>39</sup>, which is compatible with the area of a whole  
259 mouse OB slice (i.e., 2 x 2 mm). Our OB-CMOS biosensor readout captured the real-time circuitry  
260 acquisition rendered by a single electrode (i.e., pixel-like) sensor from sequential bioimaging frames  
261 encoding olfactory functional information at high spatiotemporal resolution. The voltage values of each  
262 sensing pixel were mapped on large-scale OB layers with a pseudo-color scaling. The final construction  
263 illustrated real-time bioimaging video frames of the entire OB functional circuit (**Figure. 1b**, and  
264 **Supplementary Movie 1**). The CMOS-chip surface was functionalized using a specific adhesion-promoting  
265 molecule – poly-DL-ornithine (PDLO)<sup>60</sup> that enhanced the cell-electrode interface coupling and improved  
266 SNR by increasing the seal resistance ( $R_{seal}$ ) between the tissue and the electrode ( **Figure 1c**).

## 267 **Features of spatiotemporal LFP firing patterns and activity-dependent distributions in multilayered OB** 268 **circuits**

269 The neuronal processes in the OB instantiate in five connected layers, i.e., olfactory nerve layer (ONL),  
270 glomerular layer (GL), external plexiform layer (EPL), mitral cell layer (MCL), and granule cell layer (GCL)<sup>4,5</sup>.  
271 In our study, we consider the EPL and the MCL as the projection layer (PL). In a canonical biological  
272 olfactory circuit, the olfactory sensory neurons (OSNs) project and converge their axons into the same  
273 glomeruli in the GL. Glomeruli represent the inhibitory functional units for information coding that shape  
274 the features of odorant responses<sup>61</sup>. OSNs form excitatory synapses with mitral cells in the projection  
275 layer that, in turn, project their axons to the olfactory cortex (OCx)<sup>62</sup>.

276 To address the overarching benefit of the OB-CMOS-biosensor to reveal different neuronal processes by  
277 their intrinsically generated firing patterns or the facilitation of synaptic transmission, we recorded the  
278 spontaneous and pharmacologically-induced large-scale responses in OB circuitry. We used three  
279 biochemical benchmark compounds including, 4-aminopyridine (4-AP) - potassium channel blocker,  
280 Bicuculline (BiC) - GABA<sub>A</sub> antagonist, and dizocilpine (MK-801) - N-Methyl-D-aspartate (NMDA) receptor  
281 antagonist. We computed several first-order statistical parameters (LFP energy, oscillation frequency,  
282 amplitude, and duration). Spontaneous oscillation and spiking activity were detected in all OB layers  
283 except the ONL. We found substantial responses of the OB circuit assessed by the statistical parameters  
284 shown in (**Figure 2a, right**). We also illustrated the spatial organization of those large-scale metrics by  
285 overlaying the computed mean of the functional, statistical metrics obtained from the LFP recordings on  
286 the OB circuits' optical images (**Figure. 2a left**).

287 The collective functional representations given in firing patterns of synchronized neuronal populations  
288 have been shown to exhibit a skewed distribution of firing rates in other experimental setups<sup>41,63</sup>. Our  
289 large-scale OB recordings found similar highly skewed lognormal-like distributions of firing LFPs in GCL, PL,  
290 and OCx layers (**Figure 2b**). Those skewed distributions showed a range of low and high firing patterns  
291 indicating a network-wide firing fluctuation and a diverse repertoire of participating neurons to the  
292 circuitry firing information. In other words, when the OB circuit activity was enhanced by unbalancing the  
293 inhibition or excitation drive (i.e., BiC and MK-801 treatments), the firing distribution showed lognormal-  
294 like distributions in the GCL, PL, and OCx, but a symmetric distribution in the GL, indicating a mixture of  
295 circuit firing regimes of fluctuation-driven and mean-driven, respectively<sup>64</sup>. Remarkably, this mixture of  
296 activity regimes within interconnected OB layers indicates the significance of featured spatiotemporal  
297 patterns in maintaining the sensitivity and stability balance of the OB circuitry.

298 To parametrically evaluate the spatial sparsity and diversity of participating neurons (i.e., the efficiency of  
299 neuronal representations) rendered by their firing potentials, we used Lorenz statistics to generate the  
300 Gini coefficient<sup>48</sup>. The Gini index is between zero and one and reflects the inequality of participation of  
301 neurons giving by their firing LFP values; it is higher in the unequal participation of neurons to the firing  
302 activity (**Figure 2c**). The Gini index was higher in the spontaneous recorded LFPs in all OB layers (i.e.,  
303 particularity in GCL, PL, and OCx), which decreased along with the treatment of the compound of 4-AP,  
304 BiC, and Mk-801, respectively (**Figure 2d**). This indicated that neuronal selectivity and the sparseness of  
305 representation in a given spontaneous activity reflected the strong activation of a relatively small group  
306 of cells. This is the first evidence of the sloppiness in spontaneously active OB layers. A small but stable  
307 subnetwork of neurons is critical for global stability, allowing considerable plasticity to occur in the  
308 remaining majority of cell population<sup>65</sup>.

309 On the other hand, the evoked-activity groups (i.e., BiC and MK-801) showed sloppiness but not  
310 sparseness, which inferred stiff dimensions involving more complicated combinations of other parameters



311 following the circuit modulation. Despite the overall stability we observed in the OB functional  
312 representations, changes in the LFP timings were found upon manipulating the balance of inhibition and  
313 excitation by pharmacological treatment. To evaluate these changes in all OB layers, we quantified the  
314 LFP timings irregularity using the coefficient of variation index ( $CV_2$ )<sup>49</sup>(see methods). We found a  
315 significant decrease in the  $CV_2$  (i.e., GCL=1.3, 1.04, and 0.87) in spontaneous, 4-AP, and BiC conditions,  
316 respectively (**Figure 2e**). This decrease in  $CV_2$  values indicates decreased variability, hence, increased LFP  
317 regularity upon compound treatment. Altogether, our results delineate detailed spatiotemporal  
318 functional implications of discharge patterns in distinct subnetworks of the OB layers opt for stability and  
319 spatial information coding. This could emerge from the intrinsic biophysical properties of the individual  
320 ensembles in these circuits and their distinct wiring, as reported in other brain states<sup>63</sup>.

### 321 **Characterization of oscillatory-dependent features of LFPs and waveform classification**

322 Next, we sought to identify the functional significance in the frequency and time domains of the LFP  
323 oscillatory synchronized waves rendered by the interconnected OB layers. Thus, we employed band-pass  
324 filters on the recorded data to set for high-frequency oscillation (HFO), indicating spiking activity and low-  
325 frequency-oscillation (LFO), indicating three prominent oscillatory bands in different layers (i.e., theta,  
326 beta, and gamma) (**Figure 3a**). We observed slow and fast oscillations in nearly all layers under  
327 spontaneous and pharmacologically-modulated activity (**Figure 3a**, GL and GCL layers examples). Then,  
328 we computed the synchronous frequency-time domain dynamics of a selected electrode within the 4096-  
329 microelectrode array in pseudo-color spectrograms. This spectrogram exhibited superposed sustained  
330 oscillatory events in the GL layer lasting for several seconds with coordinated frequency peaks in the  
331 theta-gamma band (**Figure 3b, left**).

332 Similarly, (**Figure 3b, right**) shows the GCL layer's spectrogram, where single transient pulses of oscillatory  
333 events occurred with a frequency range between 4-60 Hz. Further, we employed the power spectral  
334 density (PSD) analysis to simultaneously quantify a specific oscillatory band's power magnitude in the  
335 interconnected OB layers recorded by a full-CMOS array from spontaneous and drug-induced activity  
336 phases (**Figure 3c**, and **Supplementary figure 1**). Despite the noticeable fluctuations in the power  
337 magnitude upon pharmacological manipulation, we found a prevailing network frequency oscillation in  
338 the theta band in all OB layers, predominantly in GCL and GL. These results confirm evidence on the  
339 rhythmic theta oscillations coordinated by the glomerular network<sup>66</sup>. Further, the theta-gamma coupled  
340 oscillations were also reported to emerge from the individual mitral cells<sup>67</sup> and also found in hippocampal  
341 networks<sup>68</sup>. Our results suggest rhythmogenic subregions of the OB circuitry to drive distinct functional  
342 microcircuits that are vital for OB coding.

343 In addition, investigating the features of oscillatory waveforms can better elucidate the contribution of  
344 individual neuronal populations in the spatially connected layers and the olfactory information coding.  
345 Therefore, we employed unsupervised clustering of LFP waveforms, which resulted in five distinct  
346 waveform classes across all OB layers (**Figure 3d**). We analyzed hundreds of waveforms in each OB layer  
347 made possible by the multidimensional high spatiotemporal resolution CMOS-recordings. The  
348 classification process was performed by PCA and clustering with the k-means algorithm (see methods).

### 349 **Mapping the spatial firing patterns for global circuit dynamics**

350 Coherent oscillatory activity in the olfactory circuit is rendered by the spatiotemporal LFP patterning  
351 across the OB layers. We sought to exploit BIONICS to quantify the spatial mapping of large-scale firing  
352 rate encoded in the whole OB interconnected layers. To do so, we computed the spatial coherence as the

353 correlation of the encoded firing rates of interelectrode distance. The spatial extent of LFP rates is derived  
354 from each pixel in the 4096-microelectrode array to capture the dynamics of rhythmic components in  
355 space and estimate the breadth of activity origin. Thus, higher coherent electrodes have more regulated  
356 LFP firing in a specific cluster of the OB region in space, while lower coherent electrodes show more  
357 nonstationary and lower firing activity. In all recorded OB slices, coherence increased across evoked-  
358 activity conditions (spontaneous vs. 4AP, BiC, and MK-801, respectively) due to increased spatial rate  
359 coding under the activation of more cells in the OB circuits (**Figure 4a**). We also computed and quantified  
360 the population average of the spatial coherence across the pharmacological conditions divided over bins  
361 by groups (**Figure 4b** and **inset**). Despite analogous peaks in all groups, the spontaneous and 4-AP groups  
362 do not extend the right tail, as in the BiC and MK-801 groups, indicating recorded electrodes with low  
363 coherence values. On the other hand, the distributions of BiC and MK-801 groups are shifted to the right,  
364 indicating an increase of the spatial coherence for the average oscillatory activity in the whole OB  
365 neuronal circuit. These significant changes in the spatial coherence may set new standard values,  
366 especially in the GL layer (i.e., greater than 0.3 ), which meet the criteria for considering the GL as a  
367 morpho-functional basis of the spatial coding in the early processing of the sensory input<sup>69</sup>.  
368 In turn, this mapping may provide insights into a better understanding of large-scale circuit coding,  
369 decoding, and functional features of synchronized firing patterns in OB circuits.

#### 370 **Localized initiation and large-scale propagation of synchronized oscillatory activity**

371 In a multilayered OB circuit, the site of generation and spatial propagation of rhythmic electrical patterns  
372 are critical for the integrative activity of olfactory information processing. We used the simultaneous  
373 recordings from all OB layers to compute the initiation of the field potential signals and trace the  
374 spatiotemporal propagation of individual synchronized events. **Figure 4c** and **Supplementary Movie 2**  
375 show multi-frame pseudo-color images of the LFP oscillatory activity overlaid on the OB circuit's  
376 corresponding anatomical regions. In the case of MK-801 treatment, the input signal is processed at the  
377 ONL. The oscillatory activity is initiated in the GL layer, propagates across GCL and PL layers to finally send  
378 output at the OCx layers. These characterized patterns sculpt complex propagation dynamics of the  
379 cellular mechanisms underlying the spatiotemporal coordination of information processing displayed by  
380 glomerular, mitral, and granule cells in the OB circuit.

381 Furthermore, **Figure 4d** shows the horizontal propagation of the LFPs across all OB layers. The dynamical  
382 propagation is illustrated as the time shift of the peak of the oscillatory events of exemplified signal traces  
383 selected from five electrodes located in different OB layers.

384 Next, to quantitatively investigate the propagation dynamics in detail and identify the ignition site of the  
385 location-weighted average of spatiotemporal LFP patterns, we employed a population parameter using  
386 the center-of-activity trajectories (CAT)<sup>54</sup>. We calculated the CAT mean for each electrode by integrating  
387 the total number of LFP events in 200 ms voltage-coded movies (see methods). We performed the CAT  
388 analysis on the spontaneous, 4-AP, BiC, and MK-801 groups that showed distinct ignition sites in the GL  
389 layer in all groups, with a dynamic population propagation towards the OCx in BiC and MK-801 (**Figure**  
390 **4e**).

391 Furthermore, measuring a multi-site relation of spatiotemporal differences of occurring events allowed  
392 us to compute the instantaneous velocity of displacements of the CATs of LFP events in spontaneous and  
393 pharmacologically-induced groups to describe the dynamic of spreading activity within the  
394 interconnected layers of the OB circuitry. We found a range of propagation mean velocities of CATs ranged  
395 from  $(117 \pm 17$  to  $323.67 \pm 21.4$  mm/s) in spontaneous and MK-801 groups, respectively (**Figure 4f**). These

396 values are in the range of other previously reported for olfactory bulb velocity of conduction in rats (250-  
397 460 mm/s)<sup>70,71</sup>.

398 In sum, these results display the global dynamics of the OB population activity by incorporating the  
399 physical location of the electrode and the neuronal firing patterns of the multilayered OB circuitry. Also,  
400 illustrate evidence of spatial changes in interconnected neuronal populations of the bulbar  
401 rhythmogenesis upon blocking the dendrodendritic synaptic connections with MK-801. Similar results  
402 were also confirmed by previous in vivo reports on the role of NMDA receptor blockade for  
403 dendrodendritic inhibition concluded in smaller-scale electrophysiological and molecular readouts<sup>72,73</sup>.

#### 404 **Multilayered OB functional decomposition for network-wide connectivity**

405 The intricate spatiotemporal propagation patterns illustrated in the previous section involve diverse local  
406 neuronal connectivity necessary to synchronize the OB population. To unravel OB circuitry's complexity  
407 to understand the underlying information processing, we have examined the emergence of inter-bulbar  
408 functional connectivity patterns as a network of pairwise firing electrode interactions. In this context, we  
409 computed the Pearson correlation between all LFP firing electrode pairs and performed the OB regional  
410 clustering to identify the level of synchronization (**Figure 5a**). Quantitatively, the cross-correlation  
411 increased significantly after pharmacological treatment with 4-AP, BiC, and MK-801 compared to the  
412 baseline spontaneous activity (**Supplementary figure 2**). Further, by tracing the emergence of functional  
413 links from spontaneous to MK-801-evoked activity, we found in the GL, predominant distinct populations  
414 of activated ensembles forming hub microcircuits and connecting OB subregions circuitry (**Supplementary**  
415 **figure 3**). This mesoscale rewiring of those new connections is signaled by the activity-dependent changes  
416 processed by the contemporary firing ensembles in the GL and determined the interareal coordination  
417 and reorganization of the population activity. These results illustrate individual neuronal ensembles'  
418 contribution to the OB network synchrony in ever-available detail. Further, help to identify the critical OB  
419 subregions for optimizing network patterns in a large-scale spatial organization.

#### 420 **Identifying OB neuronal transmembrane current source and sink generators**

421 Next, we further exploited our platform to pinpoint the high spatiotemporal resolution of local field  
422 generators (i.e., sources and sinks) in the inter-bulbar circuitry as emerged from the oscillatory activity of  
423 OB neuronal ensembles. Thus, we constructed bidimensional maps employing the kCSD method<sup>58</sup> to  
424 estimate the average transmembrane currents extracted from the field activity recordings (**Figure 5b**, and  
425 **Supplementary Movie 3**). At the beginning of the LFP activation ( $t=187.5$  ms), the kCSD maps (**Figure 5b**,  
426 **bottom**) showed defined topographic activation features indicated by stronger and focused source  
427 generators (red color-coded in the GL and GCL layers with defined cellular identity (i.e., the  
428 microelectrodes underlying the transmembrane dipole). In contrast, the potential maps (**Figure 5b**, **top**)  
429 showed general activation with no topographical differences in the GL and GCL layers. The computed  
430 propagating source-sink generators accompanied the oscillatory synchronized activation dynamically  
431 across OB layers. These current generators are eventually conveyed information at the OCx layers ( $t=297$   
432 ms) but provided more defined and sharper localization of the cellular neuronal activation (i.e., in the OCx,  
433 multiple sources revealed by kCSD while only sinks were detected in the potential maps). These results  
434 demonstrate remarkable advantages in defining and mapping disjoint sets of sinks and sources of the OB  
435 oscillatory activity compared to potential measures in terms of strength of neuroelectrical activation and  
436 spatial topographic patterns. This allows us to circumvent field potentials' ambiguity and pinpoint the LFP

437 generators at a high spatiotemporal resolution to capture with fidelity the correlated functional and  
438 individual cellular elements.

#### 439 **Large-scale recordings validating enhanced OB-wide network connectivity and efficiency with adult** 440 **neurogenesis**

441 Next, to validate the significance of our large-scale recordings, we sought to examine the impact of  
442 ongoing neurogenesis on the dynamic of cross-scale OB circuitry and olfaction improvement. Thus, we  
443 used a genetically modified mouse model allowing the inducible expansion of neural stem cells by  
444 overexpression of Cdk4/cyclinD1 (4D+) in neural stem cells and using littermate (4D-) mice as negative  
445 controls<sup>45</sup>. Structurally, the 4D+ group has shown a neuronal expansion and increased neurogenesis  
446 indicated by the NeuN+/BrdU+ staining compared to the 4D- group (**Figure 5c**)<sup>45</sup>. On the other hand, using  
447 standard patch-clamp whole-cell recordings reported no significant functional and electrophysiological  
448 differences between 4D+ and 4D- group<sup>45</sup>. Thus, here, we obtained OB-wide patterns of activity from 4D+  
449 and 4D- groups. Then, we applied the Granger causality as a connectivity method<sup>74,75</sup> to quantify the  
450 directional information flow in the OB layers rendered by all pairwise electrode interactions (**Figure 5d**).  
451 The 4D+ group showed significantly higher unidirectional (GL→GCL, OCx →GL, GCL, PL) and bidirectional  
452 (GL→GL, PL, ONL) interactions compared with the 4D- group (**Figure 5e**).

453 However, despite the localized functional induction by the new neurons in the GCL layer of the 4D+ group,  
454 the neurogenic effect significantly enhanced the global performance capacity of information processing  
455 in the entire interconnected OB circuitry, thus promoting network economy<sup>76</sup>. To this highlight, our results  
456 demonstrate the trade-off between network cost and efficiency indicated by the increased  
457 interconnection density between OB layers, reduced physical cost (i.e., wiring cost), and increased local  
458 and global efficiencies of information transfer of the spatially connected neuronal ensembles (**Figure 5e**  
459 **inset**) (see methods). Remarkably, our results also concluded network-wide functional remodeling  
460 properties that were unfeasible in smaller-scale electrophysiological methods.

#### 461 **CONCLUSIONS AND OUTLOOK**

462 The unmet need for large-scale multi-site bioelectrical imaging techniques limits the understanding of  
463 information processing in the olfactory system. It also hampers implementing olfactory biomimetic cell-  
464 based biosensors to exploit olfaction in fundamental applications. Dense microchips composed of  
465 thousands of electrodes could overcome this limitation and reveal the olfactory spatiotemporal dynamics.  
466 Thus, we have devised BIONICS (Biohybrid Olfactory Neural Circuit on a CMOS-chip), a novel platform with  
467 high-density CMOS-based active circuit architecture for simultaneously recording from thousands of OB  
468 neuronal ensembles to delineate large-scale spatiotemporal morpho-functional plasticity in the  
469 multilayered OB circuitry.

470 These recordings are facilitated by functionalizing the CMOS-chip surface with the adhesion-promoting  
471 molecule (PDLO). This allowed a homogenous and effective electrical coupling of the neuro-electrode-  
472 wide interface (i.e., generation of a high seal resistance) that fostered cellular activity stability and optimal  
473 SNR. Accelerating development in bioelectronics nose platforms hinges on the measurement technique  
474 and biosensing instruments as well as complex analytical tools for acquiring fundamental insight about  
475 the recorded biosignals. Thus, we employed rigorous algorithms and statistical analysis to catalyze  
476 significant parameters and insights from our multidimensional recorded data.

477 We have attributed the inhomogeneity and sparsity of OB cross-scale functional representations to their  
478 skewed lognormal LFP distributions driven by a balance between excitatory and inhibitory neuronal  
479 populations to provide network stability and reliable information processing for spatiotemporal coding.  
480 We further characterized the firing patterns and their dynamical features across the OB-wide network by  
481 classifying the waveform shapes based on their rich inherent information in their nonsinusoidal  
482 oscillations. These results can inspire computational models and analytical methods to correlate these  
483 distinct waveforms to their underlying biophysical generators to describe disease conditions or behavioral  
484 states.

485 Also, facilitated by multi-site measurements of pharmacological-induced activity, we concluded the  
486 emergence of spatial network coherence, initiation of the LFP oscillations, and their cross-scale  
487 propagational dynamics at high spatiotemporal resolution.

488 The large number of recording sites in the CMOS-array confer sufficient access to simultaneous neuronal  
489 ensembles, enabling the construction of high-resolution 2D network-wide functional connectivity  
490 matrices and kCSD maps of local field potentials. Thus, providing a plausible method to probe the  
491 intrinsically sparse OB network connectivity and the contribution of local microcircuits and  
492 inhomogeneities in the LFP generation.

493 Our study suggests a new tool to address plasticity underlying olfactory spatiotemporal coding, not  
494 accessible with current imaging and electrophysiological techniques. Remarkably, we have specifically  
495 assessed the large-scale functional remodeling in the OB circuit that involved integrating newly generated  
496 neurons in the GCL layer of a mouse model with enhanced neurogenesis. We elucidated the induced  
497 functional neurogenic effect for enhancing OB network performance by integrating wide-effective  
498 information rendered by the topological organization and the local and global network efficiency. This  
499 would suggest a new generation of biologically inspired smart dynamical biomimetic systems and  
500 computational models capable of achieving faster and optimized olfactory information processing and  
501 enabling optimal selectivity and sensitivity for challenging applications.

502 In sum, our work has attempted to paint with a large-scale neurotechnological approach the breath and  
503 wonders of the chemosensory olfaction system. BIONICS has meticulously broken down the intricate firing  
504 patterns associated with olfactory code, promising progress, not only toward understanding neural  
505 processing of sensory information in the olfactory system but the biomimetic design of a bioelectronic  
506 nose and artificial chemosensory system development that may provide specific biomarkers for health  
507 and disease.

## 508 **ACKNOWLEDGMENT**

509 We would like to thank Prof. Dr. Gerd Kempermann, Dr. Caghan Kizil (DZNE, Dresden), and Dr. Alessandro  
510 Maccione (3Brain AG, Switzerland) for their insightful comments on the manuscript and the fruitful  
511 discussion. We also thank Dr. Daniel Wójcik and Mr. Władysław Średniawa (NENCKI Institute, Poland) for  
512 their support on the kCSD analysis. We are thankful to Dr. Sara Bragado Alonso for supporting experiments  
513 using the 4D line. We would also like to acknowledge the Animal platform of DZNE-Dresden (Dr. Alexander  
514 Garthe, Anne Karasinsky, and Sandra Günther) for their support. We also like to acknowledge Ms.  
515 Katarzyna Wiśniewska (Thames British School, Poland) and Ms. Brett Emery (DZNE-BIONICS lab, Germany)  
516 for proofreading and discussing the manuscript's clarity and readability.

517

## 518 **AUTHOR CONTRIBUTIONS**

519 HA: Project conceptualization, planning, performing & management, and writing the manuscript

520 FC: Provided the mouse line and data concerning the 4D overexpression system



521 DK: Performed OB slicing and technical support  
522 SK: Performed part of experiments and analyzed the data  
523 XH: Wrote the code for analysis and analyzed the data  
524 All authors revised, reviewed, and approved the final version of the manuscript.

525

## 526 REFERENCES

- 527 1. Mori, K., Nagao, H. & Yoshihara, Y. The olfactory bulb: Coding and processing of odor molecule  
528 information. *Science (80-. )*. **286**, 711–715 (1999).
- 529 2. Buck, L. & Axel, R. A novel multigene family may encode odorant receptors: A molecular basis for  
530 odor recognition. *Cell* **65**, 175–187 (1991).
- 531 3. Bushdid, C., Magnasco, M. O., Vosshall, L. B. & Keller, A. Humans can discriminate more than 1  
532 trillion olfactory stimuli. *Science (80-. )*. **343**, 1370–1372 (2014).
- 533 4. Price, J. L. & Powell, T. P. The morphology of the granule cells of the olfactory bulb. *J. Cell Sci.* **7**,  
534 91–123 (1970).
- 535 5. PRICE, J. L. & POWELL, T. P. S. The Mitral and Short Axon Cells of the Olfactory Bulb. *J. Cell Sci.* **7**,  
536 (1970).
- 537 6. Lepousez, G., Valley, M. T. & Lledo, P.-M. The Impact of Adult Neurogenesis on Olfactory Bulb  
538 Circuits and Computations. *Annu. Rev. Physiol.* **75**, 339–363 (2013).
- 539 7. Doucette, W. *et al.* Associative cortex features in the first olfactory brain relay station. *Neuron* **69**,  
540 1176–1187 (2011).
- 541 8. Shepherd, G. M. Synaptic organization of the mammalian olfactory bulb. *Physiological reviews*  
542 vol. 52 864–917 (1972).
- 543 9. Lledo, P.-M., Gheusi, G. & Vincent, J.-D. Information Processing in the Mammalian Olfactory  
544 System. (2005) doi:10.1152/physrev.00008.2004.-Recently.
- 545 10. WILKENS, W. F. & HARTMAN, J. D. An Electronic Analog for the Olfactory Processes. *J. Food Sci.*  
546 **29**, 372–378 (1964).
- 547 11. Persaud, K. & Dodd, G. Analysis of discrimination mechanisms in the mammalian olfactory  
548 system using a model nose. *Nature* **299**, 352–355 (1982).
- 549 12. Ikegami, A. & Kaneyasu, M. Olfactory detection using integrated sensors. in *Olfactory detection*  
550 *using integrated sensors* 136–139 (Proc. 3rd Int. Conf. Solid-State Sensors and Actuators  
551 (Transducers'85), Philadelphia, PA, USA (7111985), 1985).
- 552 13. Diclehan, A., Oguzhan, U. & Mehmet, T. Electronic Nose and Its Applications: A Survey. *Int. J.*  
553 *Autom. Comput.* doi:10.1007/s11633-019-1212-9.
- 554 14. Göpel, W. Chemical imaging: I. Concepts and visions for electronic and bioelectronic noses.  
555 *Sensors Actuators, B Chem.* **52**, 125–142 (1998).
- 556 15. Göpel, W. From electronic to bioelectronic olfaction, or: From artificial 'moses' to real noses.  
557 *Sensors Actuators, B Chem.* **65**, 70–72 (2000).
- 558 16. Dung, T. T. *et al.* Applications and advances in bioelectronic noses for odour sensing. *Sensors*



- 559 (Switzerland) **18**, (2018).
- 560 17. Liu, Q. Olfactory cell-based smell sensors. in *Bioinspired Smell and Taste Sensors* 45–59 (Springer  
561 Netherlands, 2015). doi:10.1007/978-94-017-7333-1\_3.
- 562 18. Wasilewski, T., Gębicki, J. & Kamysz, W. Bioelectronic nose: Current status and perspectives.  
563 *Biosens. Bioelectron.* **87**, 480–494 (2017).
- 564 19. Panzeri, S., Ince, R. A. A., Diamond, M. E. & Kayser, C. Reading spike timing without a clock:  
565 Intrinsic decoding of spike trains. *Philos. Trans. R. Soc. B Biol. Sci.* **369**, (2014).
- 566 20. Buzsáki, G., Anastassiou, C. A. & Koch, C. The origin of extracellular fields and currents-EEG,  
567 ECoG, LFP and spikes. *Nat. Rev. Neurosci.* **13**, 407–420 (2012).
- 568 21. Gelperin, A. & Tank, D. W. Odour-modulated collective network oscillations of olfactory  
569 interneurons in a terrestrial mollusc. *Nature* **345**, 437–440 (1990).
- 570 22. Rojas-Líbano, D. & Kay, L. M. Olfactory system gamma oscillations: The physiological dissection of  
571 a cognitive neural system. *Cogn. Neurodyn.* **2**, 179–194 (2008).
- 572 23. Kay, L. M. *Circuit oscillations in odor perception and memory. Progress in Brain Research* vol. 208  
573 (Elsevier B.V., 2014).
- 574 24. Kay, L. M. Theta oscillations and sensorimotor performance. *Proc. Natl. Acad. Sci. U. S. A.* **102**,  
575 3863–3868 (2005).
- 576 25. TIAN, J., TU, C., HUANG, B. & YE, X. Extracellular Potential Recording of Patterned Rat Olfactory  
577 Bulb Neuronal Network Using Planar Microelectrode Arrays. **3**, 69–74 (2017).
- 578 26. Zhuang, L. *et al.* A biohybrid nose for evaluation of odor masking in the peripheral olfactory  
579 system. *Biosens. Bioelectron.* **171**, 112737 (2021).
- 580 27. Micholt, E. *et al.* Extracellular recordings from rat olfactory epithelium slices using micro  
581 electrode arrays. *Sensors Actuators, B Chem.* **184**, 40–47 (2013).
- 582 28. Schöning, M. J., Schroth, P. & Schütz, S. The Use of Insect Chemoreceptors for the Assembly of  
583 Biosensors Based on Semiconductor Field-Effect Transistors. *Electroanalysis* **12**, 645–652 (2000).
- 584 29. Kwon, O. S. *et al.* An Ultrasensitive, Selective, Multiplexed Superbioelectronic Nose That Mimics  
585 the Human Sense of Smell. *Nano Lett.* **15**, 6559–6567 (2015).
- 586 30. Gelperin, A., Rhines, L. D., Flores, J. & Tank, D. W. Coherent network oscillations by olfactory  
587 interneurons: Modulation by endogenous amines. *J. Neurophysiol.* **69**, 1930–1939 (1993).
- 588 31. Liu, Q. *et al.* Olfactory cell-based biosensor: A first step towards a neurochip of bioelectronic  
589 nose. *Biosens. Bioelectron.* **22**, 318–322 (2006).
- 590 32. Ko, H. J. & Park, T. H. Piezoelectric olfactory biosensor: Ligand specificity and dose-dependence of  
591 an olfactory receptor expressed in a heterologous cell system. *Biosens. Bioelectron.* **20**, 1327–  
592 1332 (2005).
- 593 33. Alfinito, E., Pennetta, C. & Reggiani, L. Olfactory receptor-based smell nanobiosensors: An  
594 overview of theoretical and experimental results. *Sensors Actuators B. Chem.* **146**, 554–558  
595 (2010).

- 596 34. Lee, J. Y., Ko, H. J., Lee, S. H. & Park, T. H. Cell-based measurement of odorant molecules using  
597 surface plasmon resonance. *Enzyme Microb. Technol.* **39**, 375–380 (2006).
- 598 35. Linster, C. & Cleland, T. A. How spike synchronization among olfactory neurons can contribute to  
599 sensory discrimination. *J. Comput. Neurosci.* **10**, 187–193 (2001).
- 600 36. Imam, N. & Cleland, T. A. Rapid online learning and robust recall in a neuromorphic olfactory  
601 circuit. *Nat. Mach. Intell.* **2**, 181–191 (2019).
- 602 37. Ingebrandt, S. Bioelectronics: Sensing beyond the limit. *Nat. Nanotechnol.* **10**, 734–735 (2015).
- 603 38. Berdondini, L. *et al.* High-density electrode array for imaging in vitro electrophysiological activity.  
604 *Biosens. Bioelectron.* **21**, 167–74 (2005).
- 605 39. Imfeld, K. *et al.* Large-scale, high-resolution data acquisition system for extracellular recording of  
606 electrophysiological activity. *IEEE Trans. Biomed. Eng.* **55**, 2064–73 (2008).
- 607 40. Amin, H. *et al.* Electrical responses and spontaneous activity of human iPS-derived neuronal  
608 networks characterized for 3-month culture with 4096-electrode arrays. *Front. Neurosci.* **10**, 1–15  
609 (2016).
- 610 41. Amin, H., Nieus, T., Lonardoni, D., Maccione, A. & Berdondini, L. High-resolution bioelectrical  
611 imaging of A $\beta$ -induced network dysfunction on CMOS-MEAs for neurotoxicity and rescue studies.  
612 *Sci. Rep.* **7**, 2460 (2017).
- 613 42. Amin, H., Marinaro, F., Tonelli, D. D. P. & Berdondini, L. Developmental excitatory-to-inhibitory  
614 GABA-polarity switch is disrupted in 22q11.2 deletion syndrome: A potential target for clinical  
615 therapeutics. *Sci. Rep.* **7**, 1–18 (2017).
- 616 43. Angotzi, G. N. *et al.* SiNAPS: An implantable active pixel sensor CMOS-probe for simultaneous  
617 large-scale neural recordings. *Biosens. Bioelectron.* **126**, 355–364 (2019).
- 618 44. Buzsáki, G. Large-scale recording of neuronal ensembles. *Nat. Neurosci.* **7**, 446–451 (2004).
- 619 45. Bragado Alonso, S. *et al.* An increase in neural stem cells and olfactory bulb adult neurogenesis  
620 improves discrimination of highly similar odorants. *EMBO J.* **38**, e98791 (2019).
- 621 46. Artegiani, B., Lindemann, D. & Calegari, F. Overexpression of cdk4 and cyclinD1 triggers greater  
622 expansion of neural stem cells in the adult mouse brain. *J. Exp. Med.* **208**, 937–948 (2011).
- 623 47. Berdugo-Vega, G. *et al.* Increasing neurogenesis refines hippocampal activity rejuvenating  
624 navigational learning strategies and contextual memory throughout life. *Nat. Commun.* **11**,  
625 (2020).
- 626 48. Hurley, N. & Rickard, S. Comparing measures of sparsity. *IEEE Trans. Inf. Theory* **55**, 4723–4741  
627 (2009).
- 628 49. Holt, G. R., Softky, W. R., Koch, C. & Douglas, R. J. Comparison of discharge variability in vitro and  
629 in vivo in cat visual cortex neurons. *J. Neurophysiol.* **75**, 1806–1814 (1996).
- 630 50. Welch, P. D. The Use of Fast Fourier Transform for the Estimation of Power Spectra: A Method  
631 Based on Time Averaging Over Short, Modified Periodograms. *IEEE Trans. Audio Electroacoust.*  
632 **15**, 70–73 (1967).
- 633 51. Ding, C. & He, X. Cluster structure of K-means clustering via principal component analysis. in

- 634            *Lecture Notes in Computer Science (including subseries Lecture Notes in Artificial Intelligence and*  
635            *Lecture Notes in Bioinformatics)* vol. 3056 414–418 (Springer Verlag, 2004).
- 636    52.    Cooper Roddey, J., Girish, B. & Miller, J. P. Assessing the performance of neural encoding models  
637            in the presence of noise. *J. Comput. Neurosci.* **8**, 95–112 (2000).
- 638    53.    Gandolfo, M., Maccione, a, Tedesco, M., Martinoia, S. & Berdondini, L. Tracking burst patterns in  
639            hippocampal cultures with high-density CMOS-MEAs. *J. Neural Eng.* **7**, 056001 (2010).
- 640    54.    Chao, Z. C., Bakkum, D. J. & Potter, S. M. Region-specific network plasticity in simulated and living  
641            cortical networks: comparison of the center of activity trajectory (CAT) with other statistics. *J.*  
642            *Neural Eng.* **4**, 294–308 (2007).
- 643    55.    Eggermont, J. J., Munguia, R., Pienkowski, M. & Shaw, G. Comparison of LFP-based and spike-  
644            based spectro-temporal receptive fields and cross-correlation in cat primary auditory cortex.  
645            *PLoS One* **6**, (2011).
- 646    56.    Damos, P. Using multivariate cross correlations, Granger causality and graphical models to  
647            quantify spatiotemporal synchronization and causality between pest populations. *BMC Ecol.* **16**,  
648            (2016).
- 649    57.    Kaminski, M. J. & Blinowska, K. J. A new method of the description of the information flow in the  
650            brain structures. *Biol. Cybern.* **65**, 203–210 (1991).
- 651    58.    Potworowski, J., Jakuczun, W., Łeski, S. & Wójcik, D. Kernel current source density method.  
652            *Neural Comput.* **24**, 541–575 (2012).
- 653    59.    Latora, V. & Marchiori, M. Efficient behavior of small-world networks. *Phys. Rev. Lett.* **87**,  
654            198701-1-198701-4 (2001).
- 655    60.    Amin, H., Dipalo, M., De Angelis, F. & Berdondini, L. Biofunctionalized 3D nanopillar arrays  
656            fostering cell-guidance and promoting synapse stability and neuronal activity in networks. *ACS*  
657            *Appl. Mater. Interfaces* 1–9 (2018) doi:10.1021/acsami.8b00387.
- 658    61.    Imai, T. Construction of functional neuronal circuitry in the olfactory bulb. *Semin. Cell Dev. Biol.*  
659            **35**, 180–188 (2014).
- 660    62.    Mombaerts, P. How smell develops. *Nature Neuroscience* vol. 4 1192–1198 (2001).
- 661    63.    Mizuseki, K. & Buzsáki, G. Preconfigured, skewed distribution of firing rates in the hippocampus  
662            and entorhinal cortex. *Cell Rep.* **4**, 1010–21 (2013).
- 663    64.    Petersen, P. C. & Berg, R. W. Lognormal firing rate distribution reveals prominent fluctuation-  
664            driven regime in spinal motor networks. *Elife* **5**, 1–33 (2016).
- 665    65.    Panas, D. *et al.* Sloppiness in spontaneously active neuronal networks. *J. Neurosci.* **35**, 8480–92  
666            (2015).
- 667    66.    Fukunaga, I., Herb, J. T., Kollo, M., Boyden, E. S. & Schaefer, A. T. Independent control of gamma  
668            and theta activity by distinct interneuron networks in the olfactory bulb. *Nat. Neurosci.* **17**, 1208–  
669            1216 (2014).
- 670    67.    Margrie, T. W. & Schaefer, A. T. Theta oscillation coupled spike latencies yield computational  
671            vigour in a mammalian sensory system. *Journal of Physiology* vol. 546 363–374 (2003).

- 672 68. Buzsáki, G. & Draguhn, A. Neuronal oscillations in cortical networks. *Science* vol. 304 1926–1929  
673 (2004).
- 674 69. Lledo, P. M. & Lagier, S. Adjusting neurophysiological computations in the adult olfactory bulb.  
675 *Seminars in Cell and Developmental Biology* vol. 17 443–453 (2006).
- 676 70. Keller, A. *et al.* Functional organization of rat olfactory bulb glomeruli revealed by optical  
677 imaging. *J. Neurosci.* **18**, 2602–2612 (1998).
- 678 71. Senseman, D. M. High-speed optical imaging of afferent flow through rat olfactory bulb slices:  
679 Voltage-sensitive dye signals reveal periglomerular cell activity. *J. Neurosci.* **16**, 313–324 (1996).
- 680 72. Didier, A. *et al.* A dendrodendritic reciprocal synapse provides a recurrent excitatory connection  
681 in the olfactory bulb. *Proc. Natl. Acad. Sci. U. S. A.* **98**, 6441–6446 (2001).
- 682 73. Schoppa, N. E. Dendrodendritic inhibition in the olfactory bulb is driven by NMDA receptors. *J.*  
683 *Neurosci.* **18**, 6790–6802 (1998).
- 684 74. Brovelli, A. *et al.* Beta oscillations in a large-scale sensorimotor cortical network: Directional  
685 influences revealed by Granger causality. *Proc. Natl. Acad. Sci. U. S. A.* **101**, 9849–9854 (2004).
- 686 75. Granger, C. W. J. Investigating Causal Relations by Econometric Models and Cross-spectral  
687 Methods. *Econometrica* **37**, 424 (1969).
- 688 76. Achard, S. & Bullmore, E. Efficiency and cost of economical brain functional networks. *PLoS*  
689 *Comput. Biol.* **3**, 0174–0183 (2007).
- 690

691

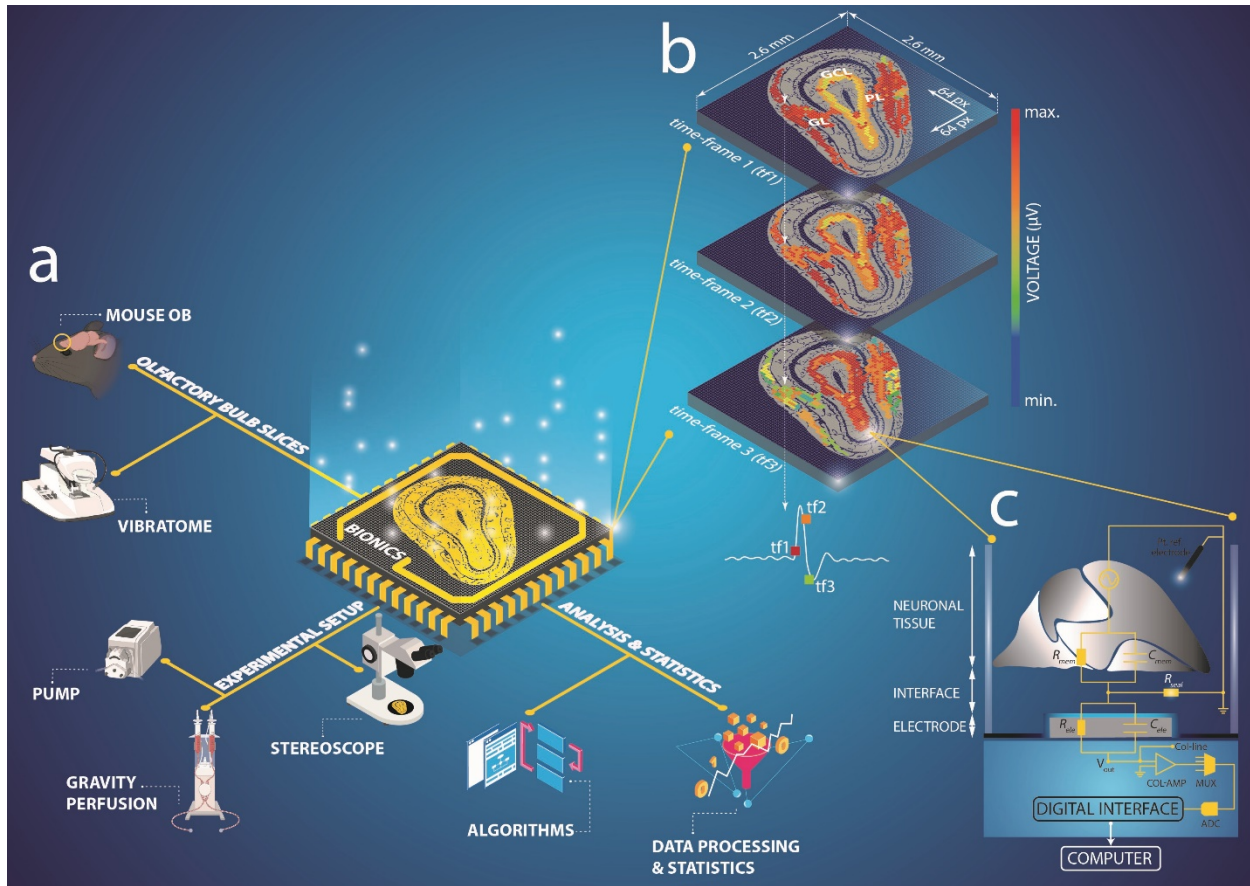

692

693

694 **Figure 1| BIONICS setup and implementation.** a) Graphical isometric imaging setup featuring the  
 695 biohybrid OB-CMOS-chip with 64x64 electrode array and integrating the experimental and analysis  
 696 components. b) Pixel-multi-frame real-time representation of the encoded OB network-wide activity  
 697 enabling pseudo-color reconstruction of the firing information from the sequential obtained frames. c)  
 698 Cell model of tissue-electrode CMOS interface showing the pixel circuit configuration, the individual  
 699 functional elements, and the communication interfaces. Surface functionalization with PDLO enhanced  
 700 the slice-electrode coupling interface and increased the SNR (i.e., increased the  $R_{seal}$ ).



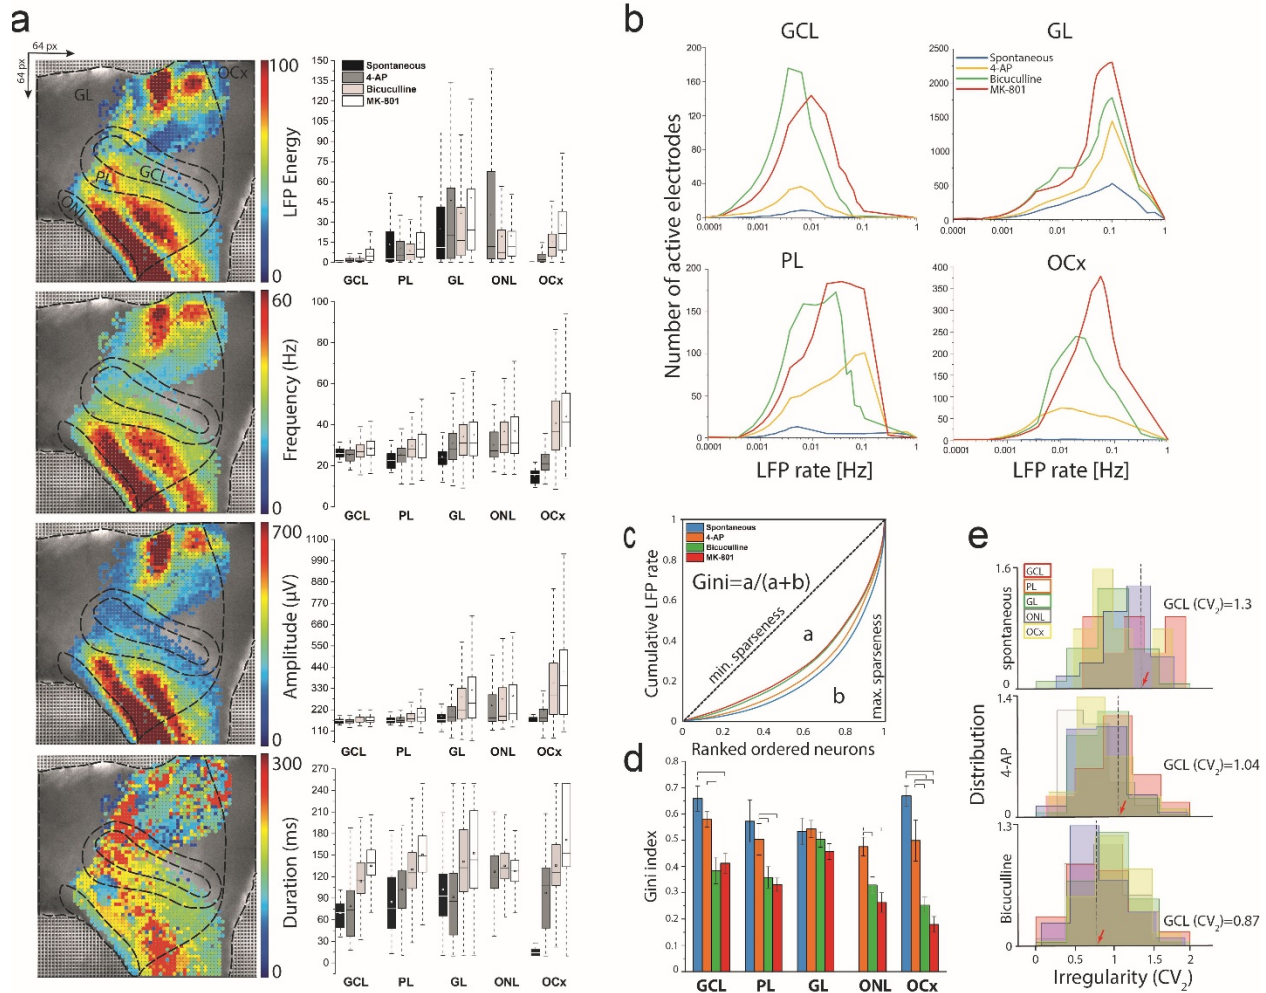

701

702 **Figure 2| OB network-wide extracellular activity parameters and distribution.** **a)** Topographical  
 703 representations and statistical characteristics of the large-scale firing patterns recorded simultaneously  
 704 from the entire OB slices (i.e., 4AP induced activity example). Pseudo-color values of the energy,  
 705 frequency, amplitude, and LFP activity duration superimposed to the OB structural images. LFP energy is  
 706 significantly higher in GL than other layers, and frequency denotes a similar frequency oscillation range in  
 707 all layers. The amplitude is also significantly higher in GL and increased with drug treatment; in contrast,  
 708 the LFP events' duration is decreased with consecutive drug treatments. **b)** LFP firing events display a  
 709 lognormal-like distribution in interconnected OB layers allowing to elucidate the network dynamics. **c)**  
 710 Lorenze curve and Gini coefficient analysis indicate the unequal neuronal participation and sparseness. **d)**  
 711 Gini coefficient quantification for the firing activity in all OB layers (\* $p < 0.05$ , \*\* $p < 0.01$ , ANOVA). **e)**  $CV_2$   
 712 values (0  $\rightarrow$  2) showing the quantification of the spread of IELs for the entire firing events. The  $CV_2$   
 713 is reduced (towards regular pattern) after blocking the GABAergic population with BIC as indicated by  
 714 moving red arrows to the left side (\*\* $p < 0.01$ , ANOVA) ( $n=24$  slices from 8 mice).



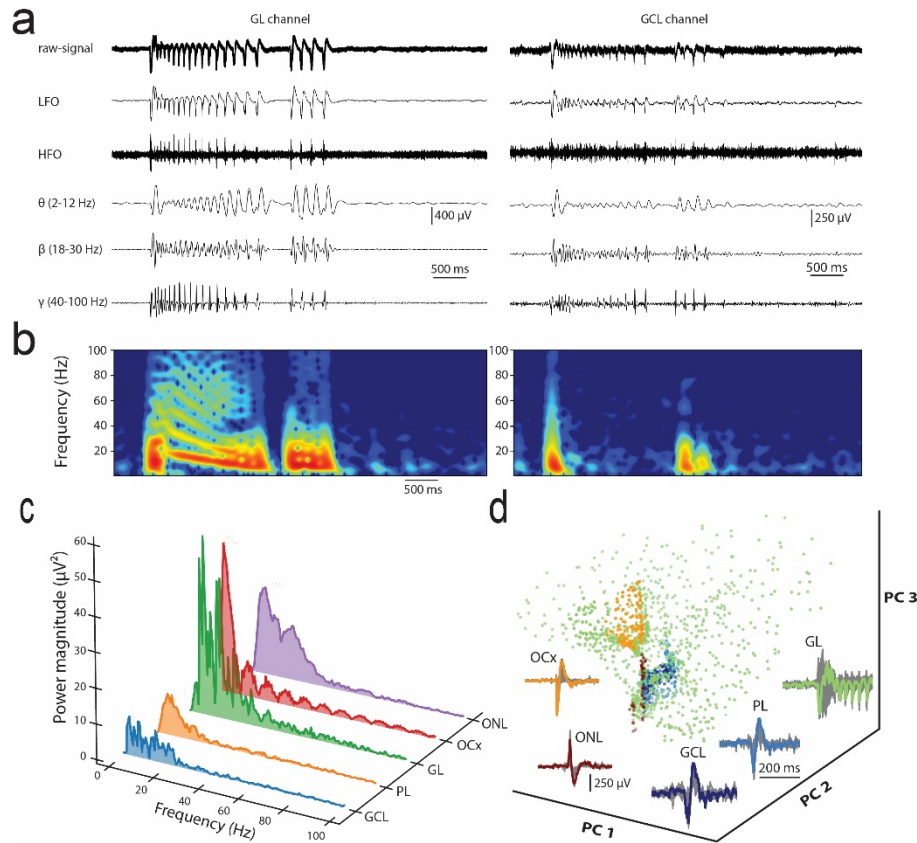

715

716 **Figure 3 | Network-wide oscillation features and waveform signatures. a)** Representative event traces  
717 from large-scale CMOS-chip recording sites showing low to high ranges of oscillatory frequencies in GL  
718 and GCL layers. Exemplary signals from the GL and GCL show wide biosignal signatures of spikes and LFPs  
719 with frequency components ( $\theta$ ,  $\beta$ , and  $\gamma$  bands). **b)** Pseudo-color spectrograms showing the Frequency-  
720 time dynamics in GL and GCL layers. **c)** Representative power spectral density analysis depicts the LFP  
721 signals' strength regarding their broadband oscillation in OB layers. It displays a high power magnitude of  
722 the  $\theta$  band in the GL. **d)** Classification of multilayered OB oscillatory waveform shapes profiled with the  
723 PCA analysis and K-means algorithm based on features extracted from the LFP events. Superimposed  
724 colored average waveforms correspond to the OB layers, and grey waveforms showing all extracted  
725 extracellular waveforms.

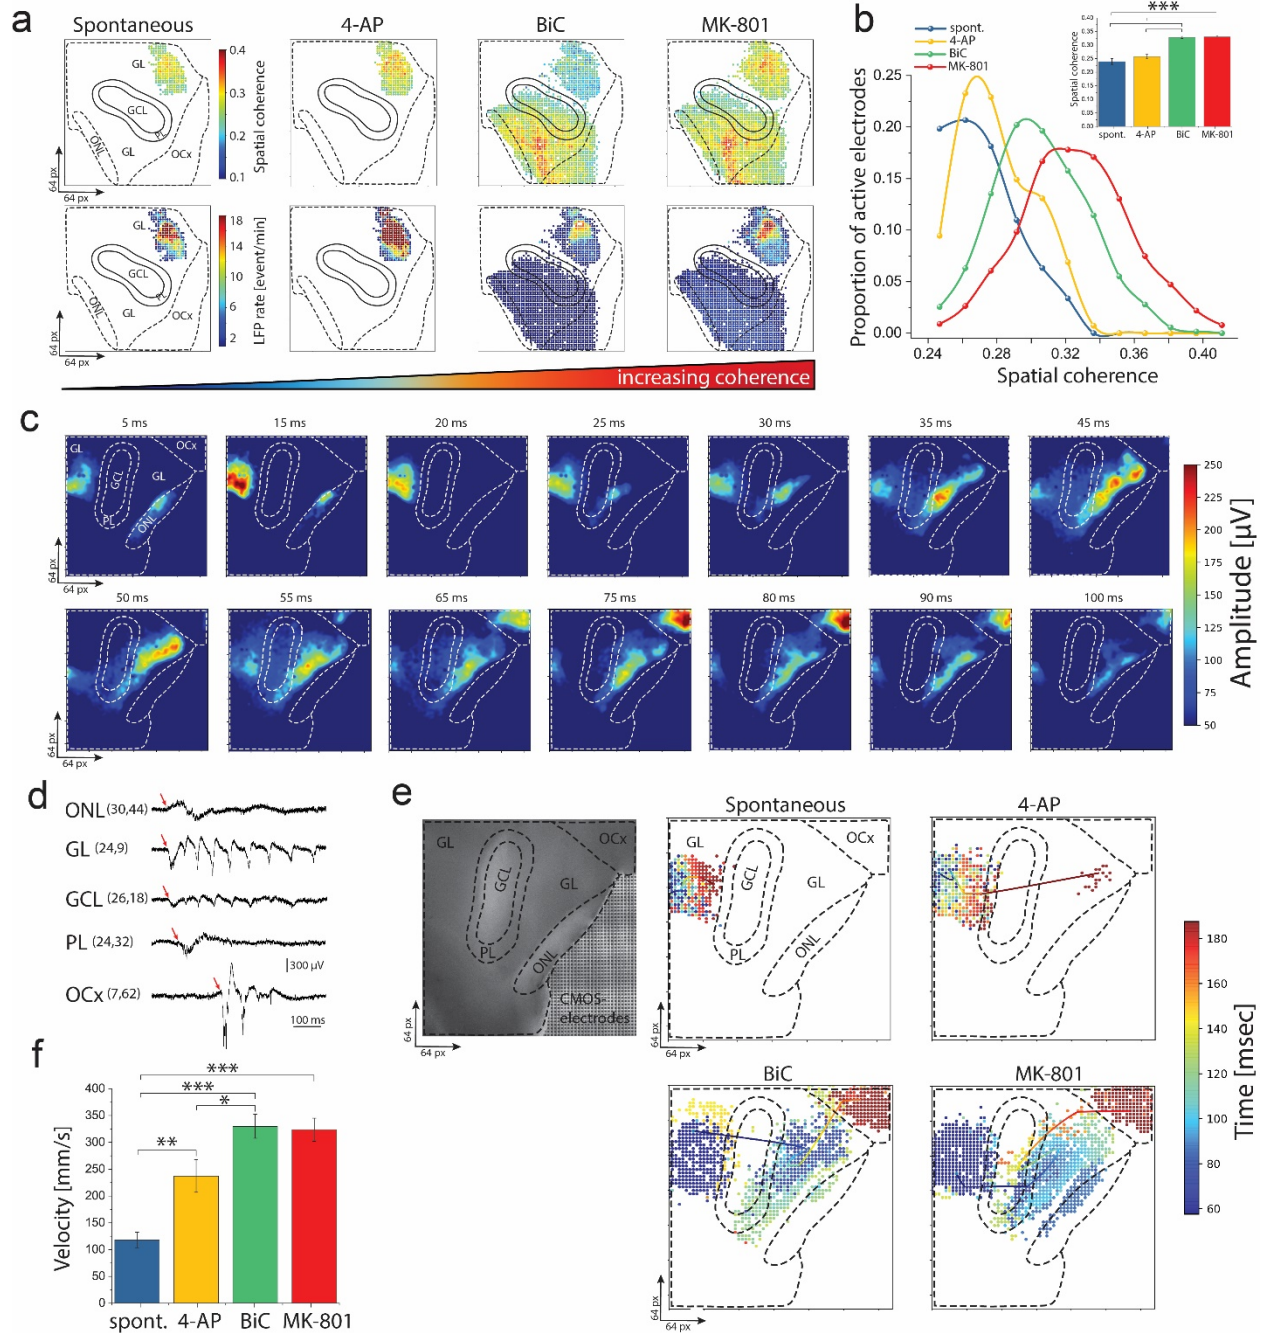

726

727 **Figure 4| Topographical analysis of spatiotemporal dynamics of coding information. a)** Spatial  
 728 coherence maps displaying correlated pairs of recorded sites in the OB circuit. Maps on top showing the  
 729 coherence, and at the bottom the maps of firing information encoded in field potentials. Spatial coherence  
 730 increasing sequentially by pharmacological treatment of 4-AP, BiC, and MK-801, respectively, yielding  
 731 more active electrodes encoding higher information of the firing rate of that spectral frequency  
 732 component (i.e., in the GL). **b)** Spatial coherence quantification showing a significantly shifted distribution  
 733 towards higher coherence values under drug-treatment compared with spontaneous activity and  
 734 summarized in (**b**, inset) (\*\* $p < 0.001$ , ANOVA) ( $n=24$  slices from 8 mice). **c)** Profile of propagation  
 735 sequence of representative LFP event showing a defined initiation (ONL and GL) and dynamic propagation

736 of the LFP firing patterns in the OB interconnected circuitry (sending output at the OCx). **d)** Temporal  
737 event traces corresponding to active recording sites in different OB layers. The red arrows point to the  
738 initiation time and shift to the right to indicate the propagation sequence (i.e., initiated in ONL-GL and  
739 terminates at OCx). **e)** Averaged CATs superimposed to the propagating active electrodes and the  
740 morphological structure of the OB layers. Time color-coded scale (*right*) indicates the CATs propagation  
741 profile and the firing electrodes of a single LFP event. **f)** Velocity of conduction of propagating LFP events  
742 is significantly increased when recording performed with 4-AP, BiC, and MK-801 compared to  
743 spontaneous ( $*p < 0.05$ ,  $**p < 0.01$ ,  $***p < 0.001$  ANOVA) ( $n=24$  slices from 8 mice).

744



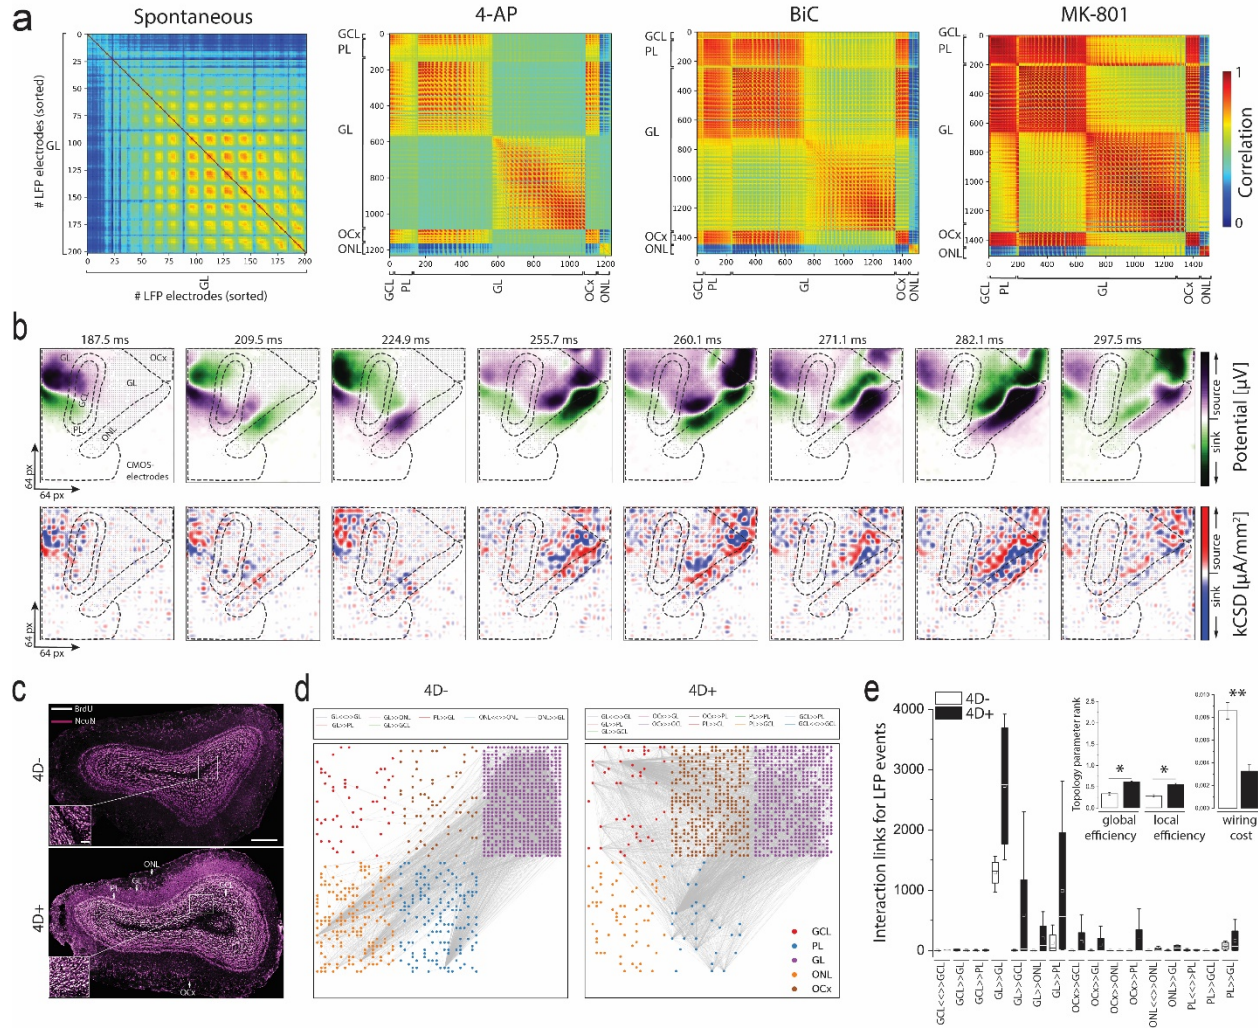

745

746 **Figure 5 | Large-scale functional connectivity analysis and validation on dynamical circuit remodeling.**

747 **a)** Functional connectivity matrices of different active regions of the OB circuit computed using the cross-  
 748 correlation method for each pair of active electrodes in the 4096-array. In the spontaneous phase, only  
 749 electrodes of the GL layer showed correlation to each other. The cross-correlation matrices in 4-AP, BiC,  
 750 and MK-801 treatment indicate higher connectivity with more electrodes simultaneously fired and higher  
 751 network synchronization than spontaneous recordings. **b)** The temporal evolution of a 2D kCSD  
 752 construction (bottom) from the LFP recordings (top) for ongoing 100 ms activity. The kCSD indicates the  
 753 sources (red tones) and sinks (blue tones) during the global field potential activation of the entire OB  
 754 circuit. **c)** Evident OB neurogenesis effect in 4D+ mouse model as obtained from<sup>45</sup>. Confocal micrographs  
 755 showing 4D+ slices with higher expression of NeuN+/BrdU+ of newborn integrated neurons mainly in the  
 756 GCL compared to 4D-. Scale bars represent 500  $\mu$ m (whole OB) and 100  $\mu$ m insets. **d)** Direction-based  
 757 functional connections of interactive pairs of firing electrodes in 4D- and 4D+ recordings computed using  
 758 Granger causality and DTF algorithms. Grey links showing only 20% of the total detected links on 64x64  
 759 CMOS-recording array and are sorted in 6 clusters of the OB layers. **e)** Quantification of (D) showing  
 760 significantly higher unidirectional and bidirectional interactive links in the 4D+ compared to 4D- (\* $p$  < 0.05,  
 761 ANOVA). (E, inset) showing the effect of induced OB neurogenesis on the topological network parameters

762 of efficiency ( $*p < 0.05$ , ANOVA) and cost of information processing in the entire OB circuit ( $**p < 0.01$ ,  
763 ANOVA) ( $n=12$  slices from 4 mice). 4D+ indicates higher network efficiency at a lower wiring cost compared  
764 to 4D- group.
